# Supplementary material for: Unraveling patterns of disrupted gene expression across a complex tissue
Source: bioRxiv or medRxiv preprint supplement (doi:10.1101/2021.07.08.451646), 2021-11-23
Supplement: Supplementary file [file media-1.pdf]

**Supplemental materials for:**

*Unraveling patterns of disrupted gene expression across a complex tissue*

Kelsie E. Hunnicutt, Jeffrey M. Good, and Erica L. Larson

**Supplemental Figures:**

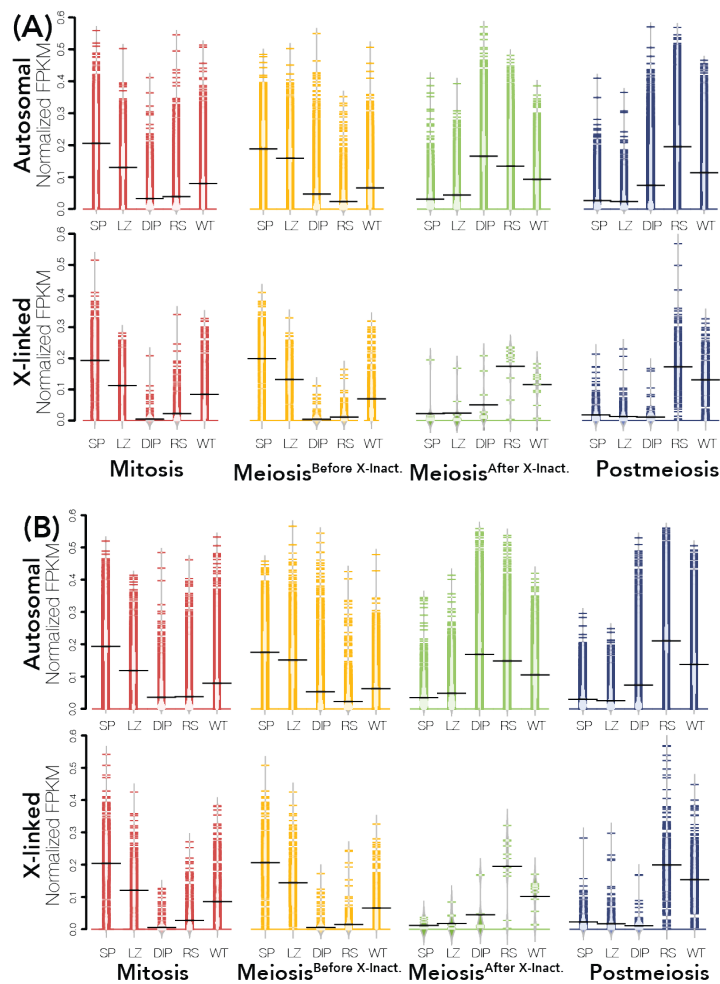

**Figure S1. Expression of induced genes in *mus* and *dom* samples.** For each sorted cell population, we defined a set of induced genes in parental samples that had a median expression two times greater than the median expression of those genes across the remaining cell types. Expression of induced genes in *mus* (A) and *dom* (B) individuals is plotted across all sample types (SP = Mitosis, LZ = Meiosis<sup>Before X-Inact.</sup>, DIP = Meiosis<sup>After X-Inact.</sup>, RS = Postmeiosis, and WT = Whole Testes) with cell type of induced genes indicated by color (red = Mitosis, yellow = Meiosis<sup>Before X-Inact.</sup>, green = Meiosis<sup>After X-Inact.</sup>, and blue = Postmeiosis). FPKM is normalized so that the sum of squares equals 1 using the R package *vegan* (Oksanen et al. 2007).

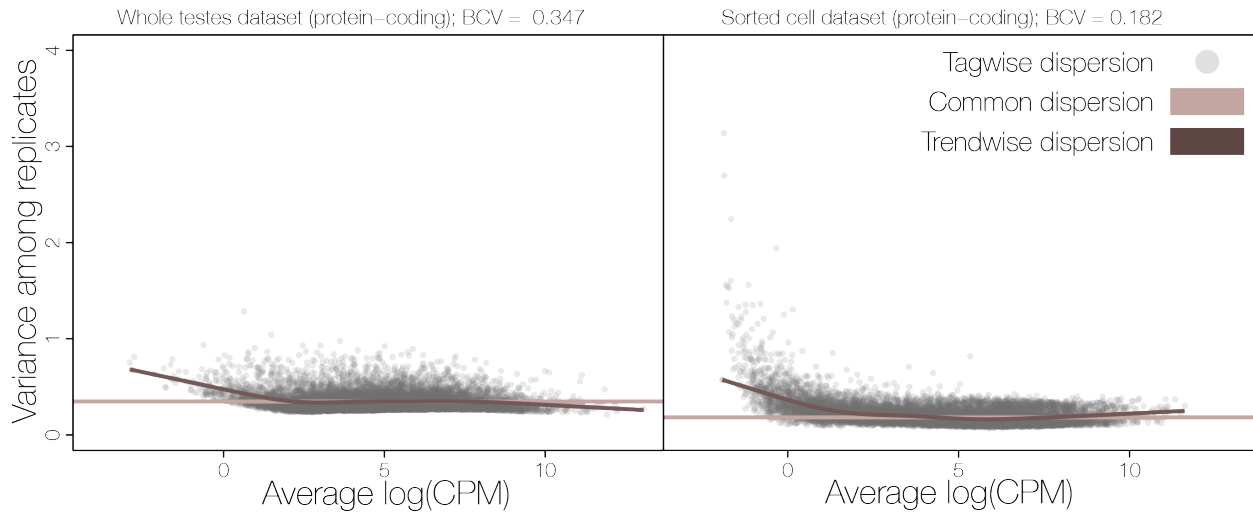

**Fig S2. Dispersion estimates and biological coefficients of variation (BCV) across protein-coding genes for the whole testes and sorted cell datasets.** All dispersion estimates were calculated in R with the edgeR package (McCarthy et al. 2012). Common dispersion for each dataset is calculated using a common estimate across all genes (taupe line). The trendwise dispersion calculation fits an estimate of dispersion based on the mean-variance trend across the entire dataset so that genes with similar abundances have similar variance estimates (brown line). Tagwise dispersion estimates dispersion on a per gene basis (gray dots). The BCV is the square root of the common dispersion.

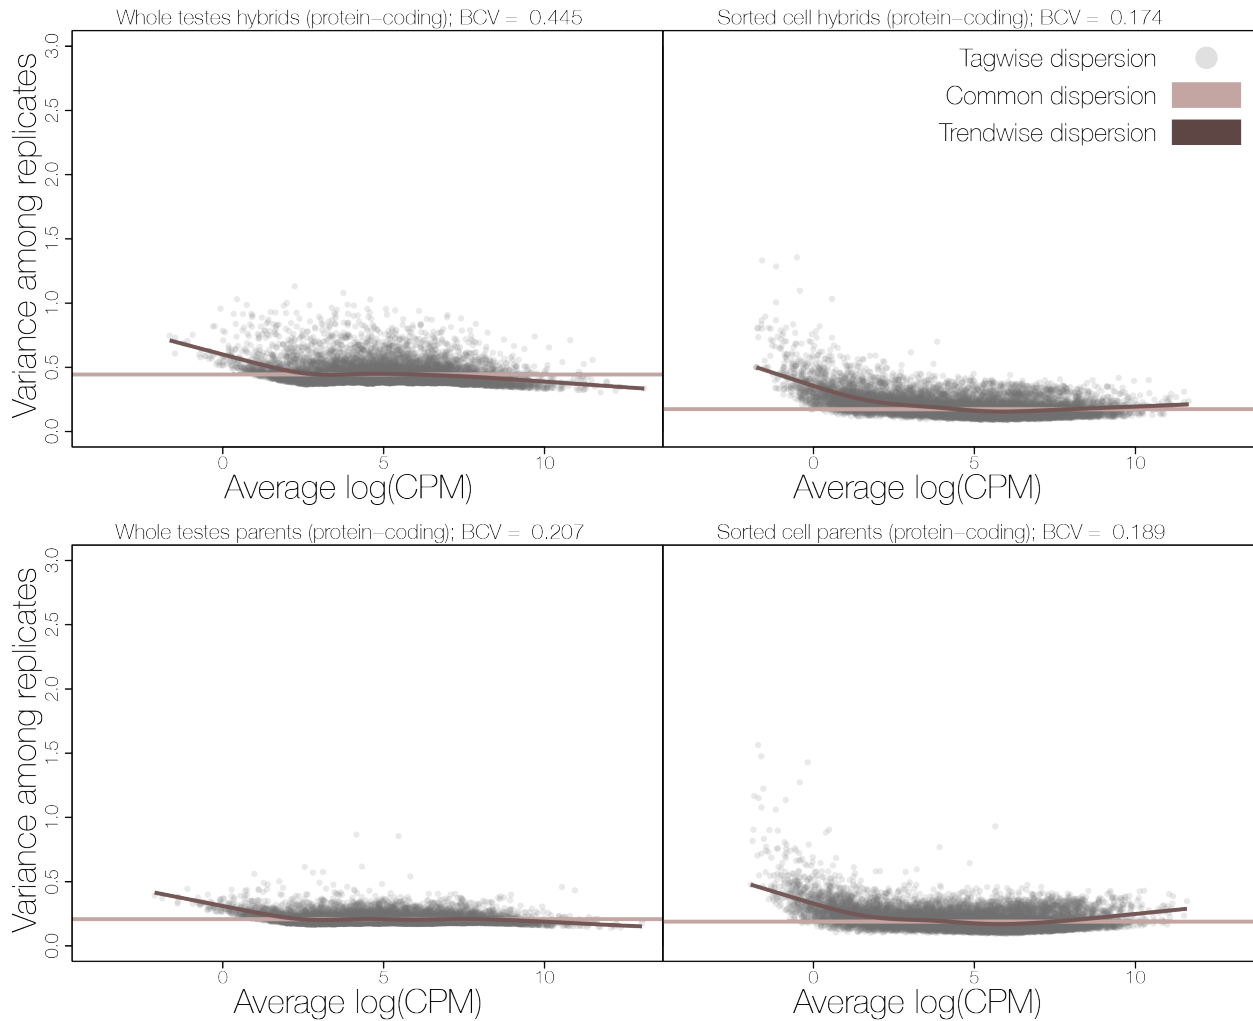

**Fig S3. Dispersion estimates and biological coefficient of variation (BCV) calculations across protein-coding genes for parental and hybrid samples separately for the whole testes and sorted cell datasets.** All dispersion estimates were calculated in R with the edgeR package (McCarthy et al. 2012). Common dispersion for each dataset is calculated using a common estimate across all genes (taupe line). The trendwise dispersion calculation fits an estimate of dispersion based on the mean-variance trend across the entire dataset so that genes with similar abundances have similar variance estimates (brown line). Tagwise dispersion estimates dispersion on a per gene basis (gray dots). The BCV is the square root of the common dispersion.

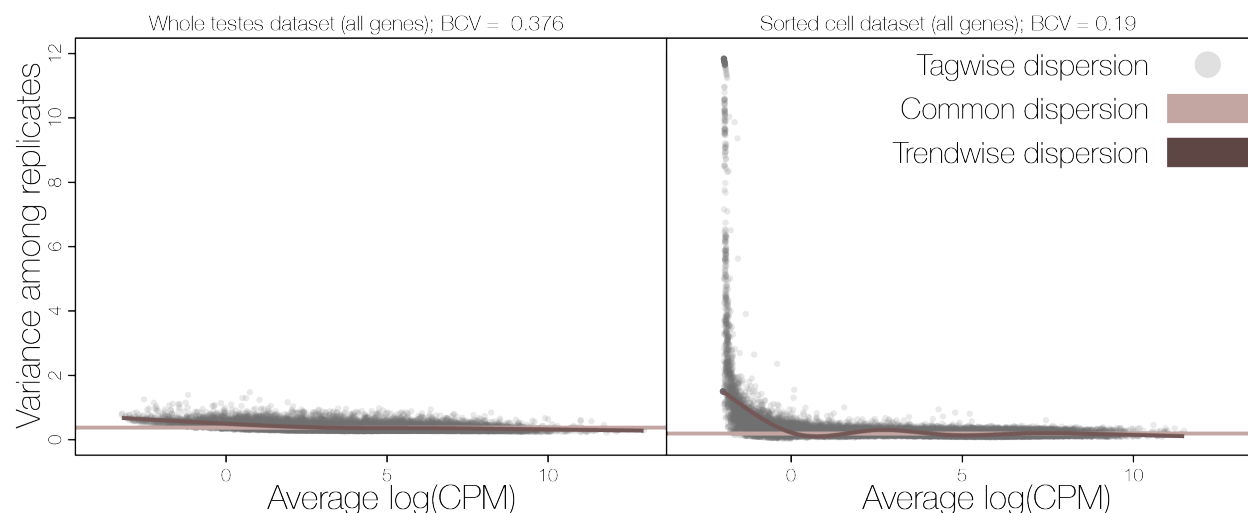

**Fig S4. Dispersion estimates and biological coefficients of variation (BCV) across all genes for the whole testes and sorted cell datasets.** All dispersion estimates were calculated in R with the edgeR package (McCarthy et al. 2012). Common dispersion for each dataset is calculated using a common estimate across all genes (taupe line). The trendwise dispersion calculation fits an estimate of dispersion based on the mean-variance trend across the entire dataset so that genes with similar abundances have similar variance estimates (brown line). Tagwise dispersion estimates dispersion on a per gene basis (gray dots). The BCV is the square root of the common dispersion.

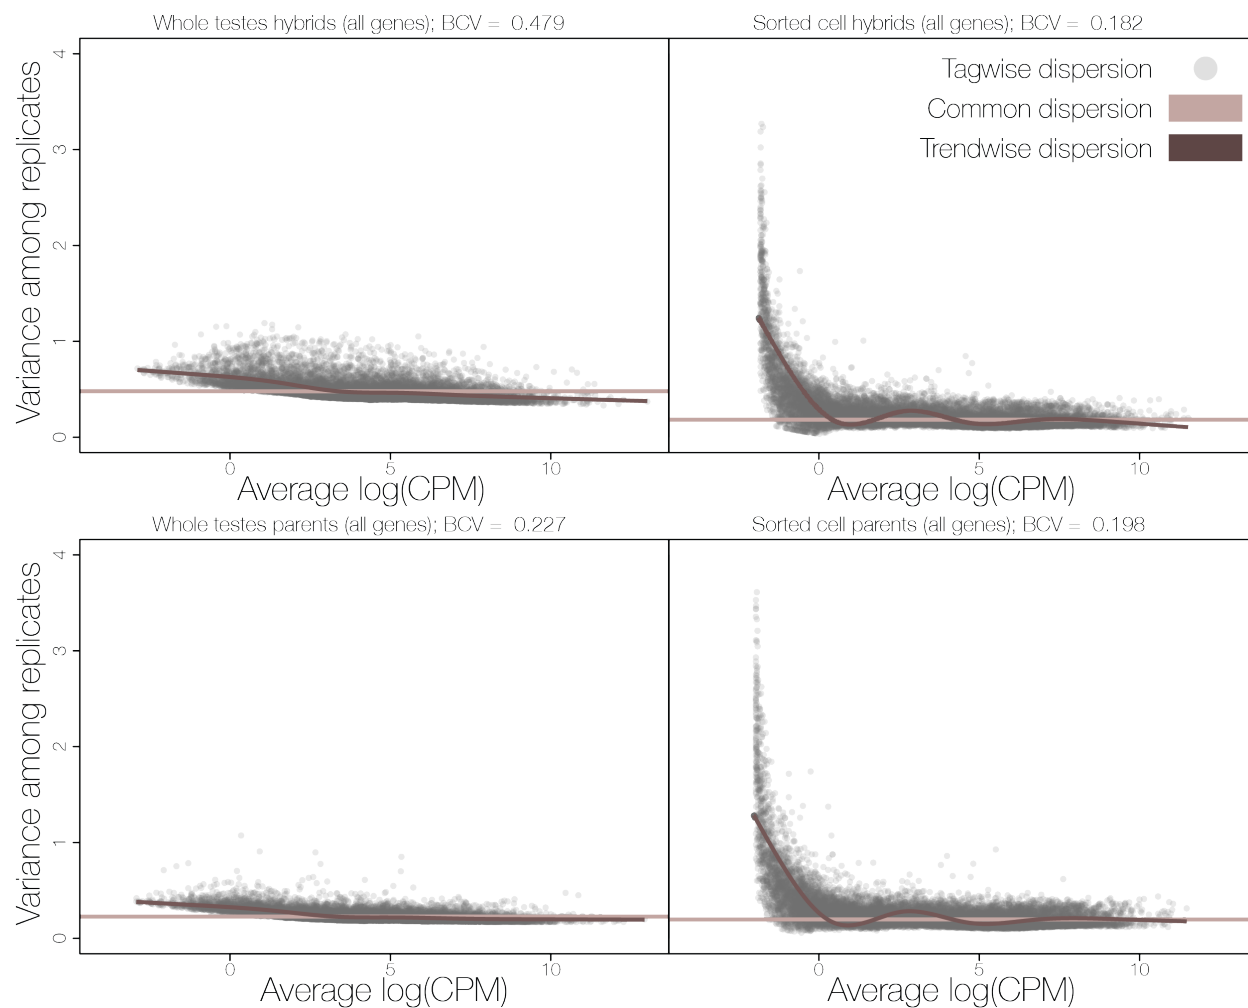

**Fig S5. Dispersion estimates and biological coefficient of variation (BCV) calculations across all genes for parental and hybrid samples separately for the whole testes and sorted cell datasets.** All dispersion estimates were calculated in R with the edgeR package (McCarthy et al. 2012). Common dispersion for each dataset is calculated using a common estimate across all genes (taupe line). The trendwise dispersion calculation fits an estimate of dispersion based on the mean-variance trend across the entire dataset so that genes with similar abundances have similar variance estimates (brown line). Tagwise dispersion estimates dispersion on a per gene basis (gray dots). The BCV is the square root of the common dispersion.

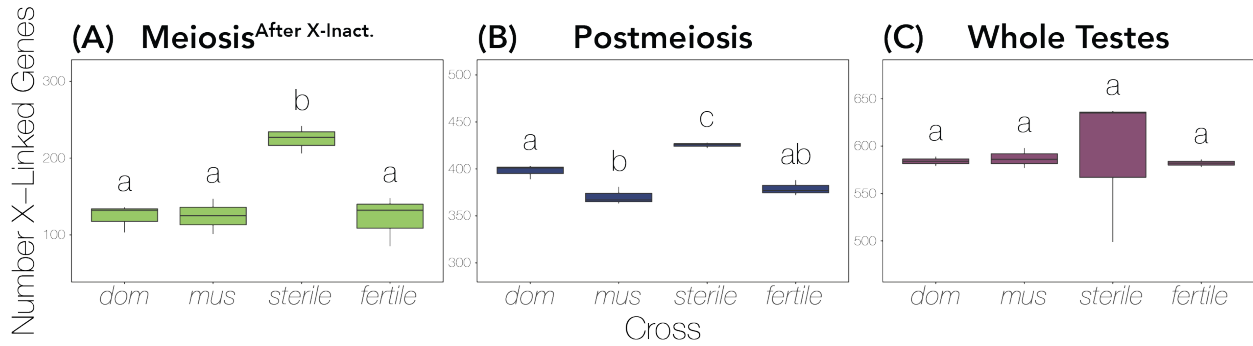

**Fig S6. Overexpression of the X chromosome in *sterile* hybrids is detectable in sorted cell populations but not whole testes.** Mean number of X-linked genes for each cross within a sample type with a minimum expression of one FPKM across all samples within a dataset (sorted cells or whole testes). Whiskers show 95% confidence intervals. Different letters above error bars indicate a significant difference between means at  $p < 0.05$  using a post-hoc Tukey HSD test. Each panel shows results from three sample types, Meiosis<sup>After X-Inact.</sup> (A; green), Postmeiosis (B; blue), and Whole Testes (C; purple).

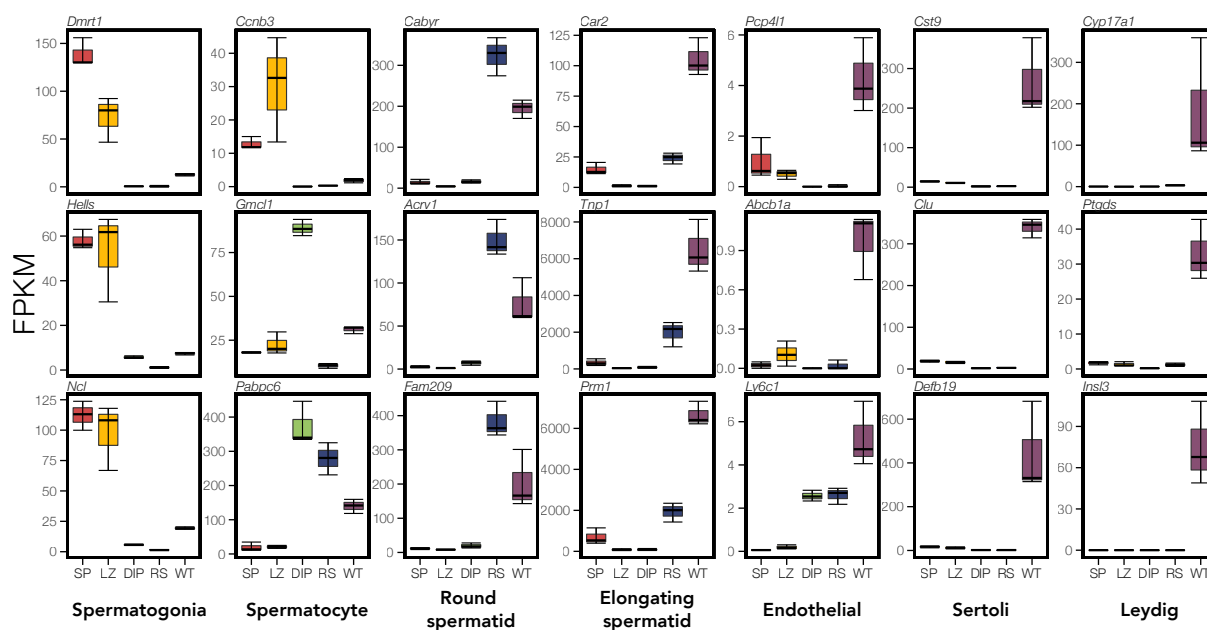

**Fig S7. Whole testes expression profiles show signatures of many diverse cell types.**

Expression of cell-specific marker genes across each sample type for *mus* reference samples. We quantified expression (FPKM) of three marker genes (rows) associated with testes-specific cell types (columns). Each panel displays marker expression in each sample type (red = Mitosis (SP), yellow = Meiosis<sup>Before X-Inact.</sup> (LZ), green = Meiosis<sup>After X-Inact.</sup> (DIP), blue = Postmeiosis (RS), and purple = Whole Testes (WT)). Note, *Ccnb3* expression is specific to Meiotic<sup>Before X-Inact.</sup> cells (Maekawa et al. 2004), and *Gmcl1* is specific to Meiotic<sup>After X-Inact.</sup> cells (Nguyen et al. 2002).

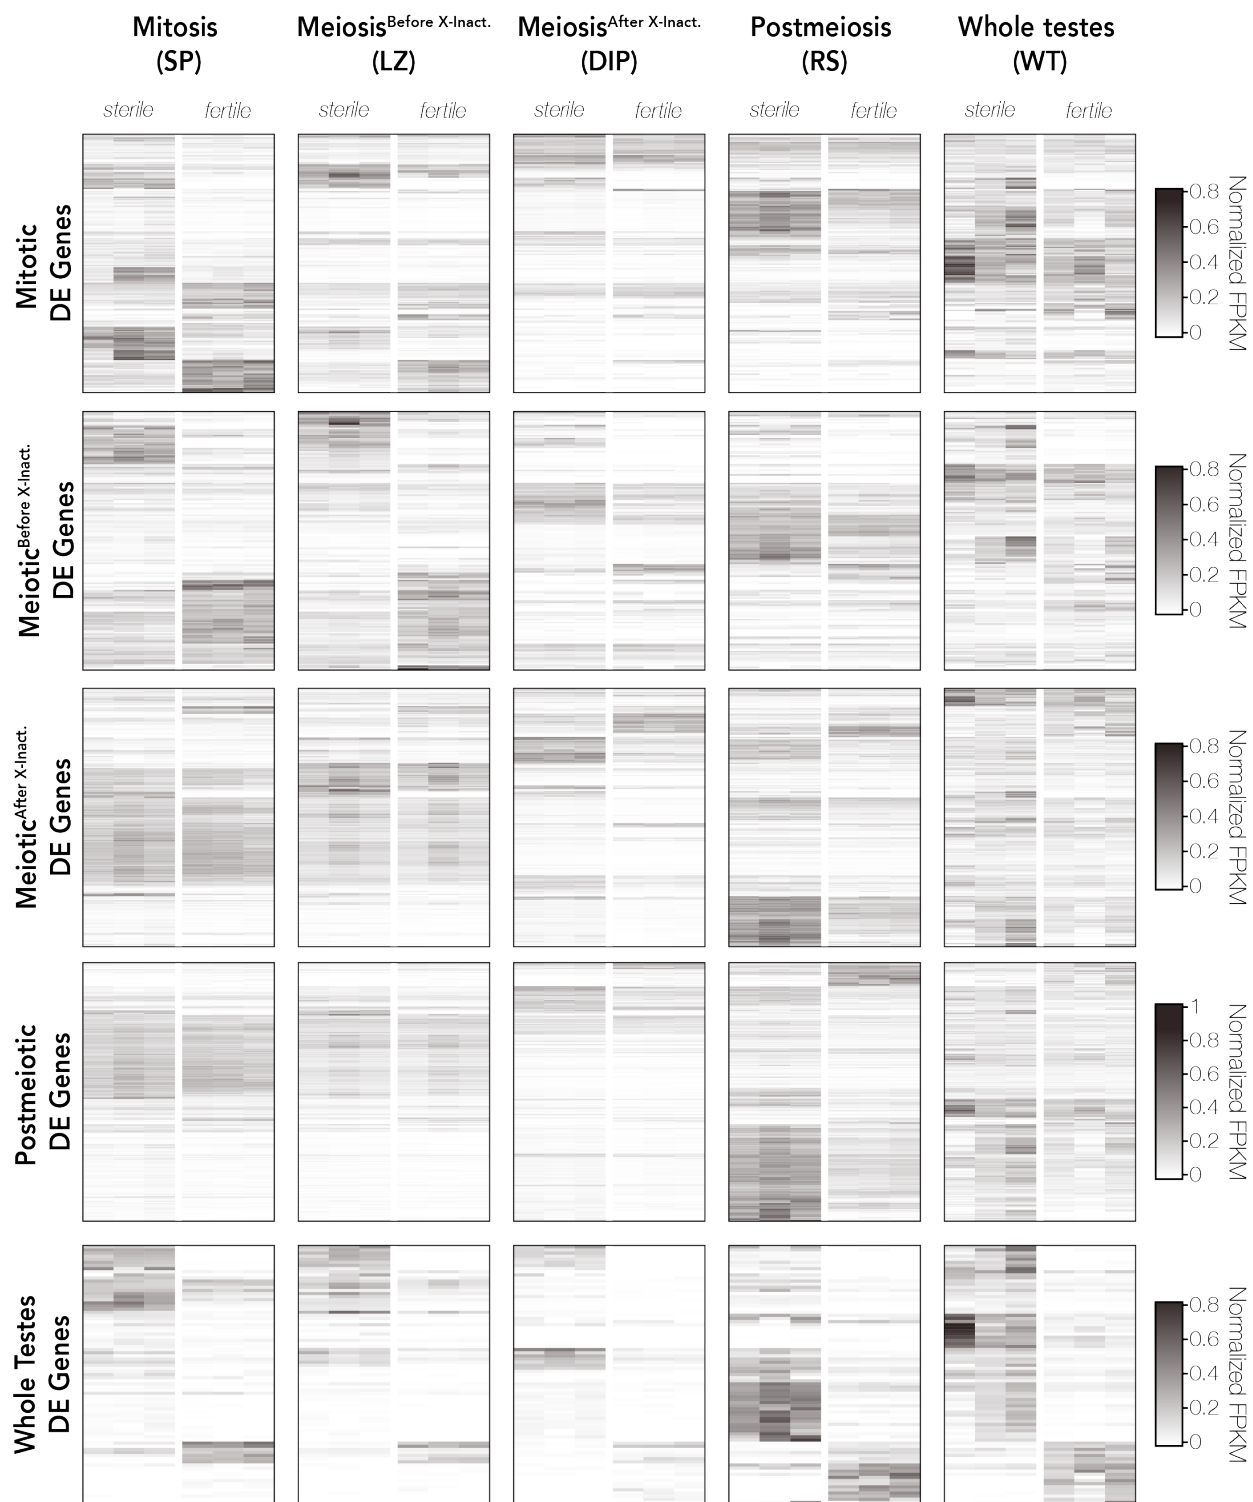

**Fig S8. Expression of sample-type specific DE genes in *sterile* and *fertile* hybrids across all sample types.** FPKM values were normalized so that the sum of squares equals one using the R package *vegan* (Oksanen et al. 2007). Beanplots were generated with the R package *beanplot* (Kampstra 2008). Each heatmap has gene expression plotted as normalized FPKM values that



are hierarchically clustered using Euclidean distance. Each row plots expression across one gene and darker colors indicate higher expression. Heatmaps were generated with the R package ComplexHeatmap v.2.3.2 (Gu et al. 2016).

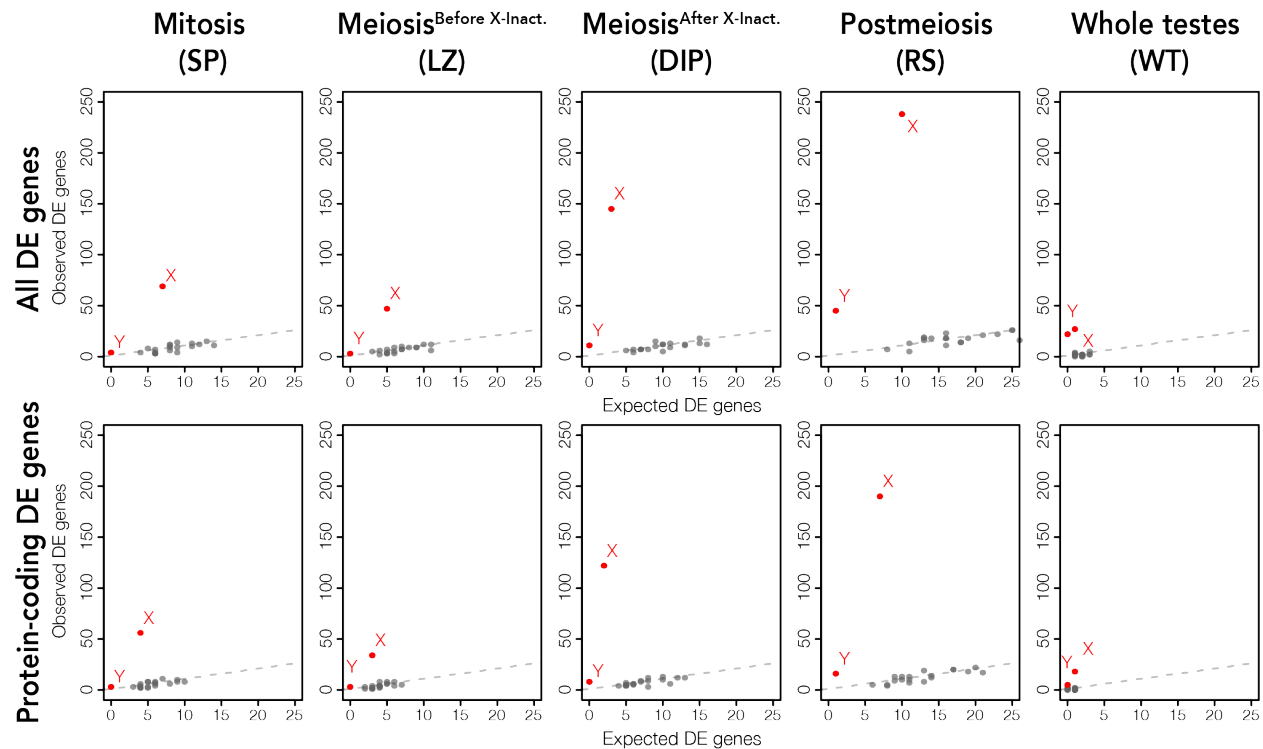

Fig S9. Sex chromosomes are enriched for DE genes across all stages. For each sample type, a scatter plot displays expected versus observed counts of DE genes for each chromosome. Chromosomes above the dashed line are over-enriched for DE genes, and chromosomes below the dashed line are under-enriched for DE genes, with chromosomes where p-values were less than 0.001 after FDR correction are highlighted in red and labelled. Upper panels are DE genes from all annotated genes and lower panels are DE genes from only protein-coding genes.

**Supplemental Tables:**

Table S1: Sample information and read counts. Sample IDs correspond to the cross of the individual (CC = CZECHII/EiJ, LL = LEWES/EiJ, PP = PWK/PhJ, and WW = WSB/EiJ), the individuals ID number, and the sample type (SP = Mitosis, LZ = Meiosis<sup>Before X-Inact.</sup>, DIP = Meiosis<sup>After X-Inact.</sup>, RS = Postmeiosis, and WT = Whole Testes).

| Sample ID     | SRA Accession          | Raw Reads (F only) | Post-Tophat PWK-Alignment Reads (F+R) | Post-Tophat WSB-Alignment Reads (F+R) | Post-Suspenders Reads (F+R) | Assigned FeatureCount Read Pairs (no multi-mapped reads) |
|---------------|------------------------|--------------------|---------------------------------------|---------------------------------------|-----------------------------|----------------------------------------------------------|
| CCPP-21.1-DIP | SRR2761570, SRR2761592 | 21477056           | 26340755                              | 25674973                              | 19232543                    | 7381118                                                  |
| CCPP-21.1-LZ  | SRR2761571, SRR2761593 | 26998246           | 33134843                              | 32416769                              | 23610512                    | 8867722                                                  |
| CCPP-21.1-RS  | SRR2761572, SRR2761594 | 22195796           | 35312787                              | 34717874                              | 19809616                    | 7721308                                                  |
| CCPP-21.1-SP  | SRR2761573, SRR2761595 | 31751428           | 38868844                              | 37967473                              | 27275613                    | 9931488                                                  |
| CCPP-21.2-DIP | SRR2761596             | 36852964           | 46965915                              | 45728821                              | 33544699                    | 12803354                                                 |
| CCPP-21.2-LZ  | SRR2761574, SRR2761597 | 26549896           | 32060131                              | 31287872                              | 23526641                    | 8786313                                                  |
| CCPP-21.2-RS  | SRR2761598             | 22235268           | 36029725                              | 35270117                              | 20281803                    | 7942450                                                  |
| CCPP-21.2-SP  | SRR2761575, SRR2761599 | 28802542           | 34567190                              | 33765425                              | 24615826                    | 8998231                                                  |
| CCPP-21.3-DIP | SRR2761549, SRR2761600 | 22468784           | 27090066                              | 26309504                              | 20152293                    | 7764490                                                  |
| CCPP-21.3-LZ  | SRR2761550, SRR2761601 | 20428992           | 24566552                              | 23933367                              | 17891667                    | 6709337                                                  |
| CCPP-21.3-RS  | SRR2761602             | 32112934           | 45597240                              | 44284041                              | 28554464                    | 11260227                                                 |
| CCPP-21.3-SP  | SRR2761551, SRR2761603 | 21751826           | 26924883                              | 26217413                              | 19057748                    | 7075581                                                  |
| LLPP-17.2-DIP | SRR2761576, SRR2761604 | 19989428           | 24880530                              | 24872825                              | 18021849                    | 6822392                                                  |
| LLPP-17.2-RS  | SRR2761577, SRR2761605 | 22525160           | 33916646                              | 33841987                              | 20044435                    | 7762604                                                  |
| LLPP-18.1-LZ  | SRR2761578, SRR2761606 | 27817084           | 35876214                              | 35985195                              | 24854243                    | 8985489                                                  |
| LLPP-19.1-DIP | SRR2761552, SRR2761607 | 18058676           | 22479413                              | 22438712                              | 16204722                    | 6096994                                                  |
| LLPP-19.1-SP  | SRR2761579, SRR2761608 | 33430222           | 39885520                              | 39708715                              | 28440056                    | 10028665                                                 |
| LLPP-19.2-RS  | SRR2761553, SRR2761609 | 18407584           | 28601605                              | 28594856                              | 16484648                    | 6323895                                                  |
| LLPP-19.3-DIP | SRR2761554, SRR2761610 | 19415690           | 23093669                              | 23054030                              | 17375360                    | 6661074                                                  |
| LLPP-19.3-RS  | SRR2761555, SRR2761611 | 19781658           | 27402180                              | 27494017                              | 17681421                    | 6959808                                                  |
| LLPP-22.7-LZ  | SRR2761556, SRR2761612 | 20036778           | 25245447                              | 25262290                              | 17820330                    | 6477961                                                  |
| LLPP-22.7-SP  | SRR2761557, SRR2761613 | 18338020           | 22593735                              | 22567117                              | 16094821                    | 5971162                                                  |
| LLPP-22.8-LZ  | SRR2761558, SRR2761614 | 23411888           | 29264006                              | 29336299                              | 21033663                    | 7685705                                                  |
| LLPP-22.8-SP  | SRR2761559, SRR2761615 | 19297400           | 22586043                              | 22519133                              | 16561826                    | 6017707                                                  |
| LLPP-272-WT   | SRR2060953             | 124219124          | 142525063                             | 142380020                             | 108427854                   | 42898717                                                 |
| LLPP-290-WT   | SRR2060952             | 34464432           | 38526459                              | 38543523                              | 32163922                    | 13313386                                                 |
| LLPP-93-WT    | SRR2060950             | 63070002           | 47005603                              | 47097532                              | 34088411                    | 12586942                                                 |
| LLWW-148-WT   | SRR2060837             | 101248844          | 74722027                              | 77167079                              | 54406591                    | 19891163                                                 |
| LLWW-149-WT   | SRR2060842             | 107432468          | 128083415                             | 130793609                             | 93850300                    | 35897894                                                 |
| LLWW-150-WT   | SRR2060843             | 100497198          | 108902509                             | 111315069                             | 81179922                    | 31309028                                                 |

|               |                        |           |           |           |          |          |
|---------------|------------------------|-----------|-----------|-----------|----------|----------|
| PPCC-151-WT   | SRR2060844             | 76325172  | 58327482  | 56337894  | 39979615 | 14783396 |
| PPCC-152-WT   | SRR2060846             | 98804204  | 118179509 | 115163595 | 85840471 | 33494033 |
| PPCC-170-WT   | SRR2060939             | 76594232  | 90758054  | 88360116  | 66410204 | 25980058 |
| PPLL-131-WT   | SRR2060954             | 24882156  | 28222294  | 28244608  | 23110713 | 9474627  |
| PPLL-15.2-DIP | SRR2761580, SRR2761616 | 23647380  | 30142023  | 29984831  | 21268666 | 8069338  |
| PPLL-15.2-RS  | SRR2761581, SRR2761617 | 23128976  | 40531135  | 40317066  | 20658116 | 7842258  |
| PPLL-16.1-DIP | SRR2761560, SRR2761618 | 20048656  | 24991779  | 24867469  | 17763716 | 6646884  |
| PPLL-16.1-LZ  | SRR2761561, SRR2761619 | 21281980  | 27273010  | 27117068  | 18786051 | 6912012  |
| PPLL-16.1-RS  | SRR2761562, SRR2761620 | 19168394  | 29754797  | 29751712  | 16517064 | 6361843  |
| PPLL-16.1-SP  | SRR2761563, SRR2761621 | 22451632  | 27796017  | 27662178  | 19388612 | 7051214  |
| PPLL-17.1-DIP | SRR2761622             | 37268646  | 45864903  | 45637800  | 33049299 | 12492601 |
| PPLL-17.1-LZ  | SRR2761582, SRR2761623 | 30492632  | 41043284  | 40790863  | 27195859 | 9923511  |
| PPLL-17.1-RS  | SRR2761624             | 25277730  | 40651852  | 40533661  | 22361132 | 8609292  |
| PPLL-17.1-SP  | SRR2761583, SRR2761625 | 33687062  | 40791246  | 40560457  | 29439375 | 11005974 |
| PPLL-17.3-LZ  | SRR2761564, SRR2761626 | 19742116  | 25086723  | 24944022  | 17398240 | 6412712  |
| PPLL-17.3-SP  | SRR2761565, SRR2761627 | 23598202  | 28711605  | 28465007  | 20271530 | 7299012  |
| PPLL-278-WT   | SRR2060955             | 102188034 | 133331212 | 133813859 | 89775343 | 33934908 |
| PPLL-52-WT    | SRR2060951             | 44950474  | 53997983  | 53670612  | 35822322 | 12838352 |
| WWLL-3.1-DIP  | SRR2761584, SRR2761628 | 21970318  | 26565246  | 27212060  | 19982585 | 7588358  |
| WWLL-3.1-RS   | SRR2761585, SRR2761629 | 22523002  | 33735184  | 34378293  | 20360830 | 7972083  |
| WWLL-3.1-SP   | SRR2761566, SRR2761630 | 21104146  | 25684138  | 26185875  | 18283388 | 6458669  |
| WWLL-4.1-LZ   | SRR2761567, SRR2761631 | 20075246  | 25176105  | 25778595  | 17983406 | 6642792  |
| WWLL-6.1-RS   | SRR2761568, SRR2761632 | 20388762  | 29125360  | 29720516  | 18060410 | 7053241  |
| WWLL-7.1-DIP  | SRR2761569, SRR2761633 | 19974584  | 23300740  | 24024169  | 17794108 | 6798887  |
| WWLL-7.2-DIP  | SRR2761586, SRR2761634 | 20182808  | 24558522  | 25232730  | 18511737 | 6969049  |
| WWLL-7.2-LZ   | SRR2761587, SRR2761635 | 20087232  | 25629600  | 26319298  | 18253476 | 6675109  |
| WWLL-7.2-RS   | SRR2761588, SRR2761636 | 20822386  | 28662881  | 29206953  | 18976974 | 7607417  |
| WWLL-7.2-SP   | SRR2761589, SRR2761637 | 25852196  | 32343831  | 33080949  | 22904315 | 8266300  |
| WWLL-7.3-LZ   | SRR2761590, SRR2761638 | 41266036  | 53274705  | 54449278  | 37203850 | 13432758 |
| WWLL-7.3-SP   | SRR2761591, SRR2761639 | 35512824  | 43398931  | 44340114  | 31279482 | 11230973 |

Table S2: Counts of different categories of hybrid DE genes for each sample type.

| Stage                              | X-linked DE genes | Y-linked DE genes | Autosomal DE genes | Up-regulated in <i>sterile</i> | Down-regulated in <i>sterile</i> | Total DE genes |
|------------------------------------|-------------------|-------------------|--------------------|--------------------------------|----------------------------------|----------------|
| Mitosis                            | 69                | 4                 | 158                | 152                            | 79                               | 231            |
| Meiosis <sup>Before X-Inact.</sup> | 47                | 3                 | 128                | 88                             | 90                               | 178            |
| Meiosis <sup>Before X-Inact.</sup> | 145               | 11                | 187                | 284                            | 59                               | 343            |
| Postmeiosis                        | 238               | 45                | 323                | 497                            | 109                              | 606            |
| Whole Testes                       | 27                | 22                | 34                 | 63                             | 20                               | 83             |

Table S3: Direction of regulation (relative to *sterile*) for hybrid DE genes in whole testes and each sorted cell populations for each pairwise comparison.

| Comparison                                | Up in WT & down in sorted cell population | Down in WT & up in sorted cell population | Up-regulated in both | Down-regulated in both | Misregulated between sorted cell population and whole testes (%) |
|-------------------------------------------|-------------------------------------------|-------------------------------------------|----------------------|------------------------|------------------------------------------------------------------|
| Mitosis and WT                            | 0                                         | 0                                         | 25                   | 6                      | 0                                                                |
| Meiosis <sup>Before X-Inact.</sup> and WT | 0                                         | 0                                         | 22                   | 5                      | 0                                                                |
| Meiosis <sup>Before X-Inact.</sup> and WT | 0                                         | 0                                         | 28                   | 5                      | 0                                                                |
| Postmeiosis and WT                        | 0                                         | 0                                         | 47                   | 17                     | 0                                                                |

Table S4: Direction of regulation (relative to *mus*) for DE genes between *dom* and *mus* in whole testes and each sorted cell populations for each pairwise comparison.

| Comparison                                | Up in WT & down in sorted cell population | Down in WT & up in sorted cell population | Up-regulated in both | Down-regulated in both | Misregulated between sorted cell population and whole testes (%) |
|-------------------------------------------|-------------------------------------------|-------------------------------------------|----------------------|------------------------|------------------------------------------------------------------|
| Mitosis and WT                            | 22                                        | 14                                        | 392                  | 712                    | 3.26                                                             |
| Meiosis <sup>Before X-Inact.</sup> and WT | 10                                        | 15                                        | 357                  | 553                    | 2.75                                                             |
| Meiosis <sup>Before X-Inact.</sup> and WT | 11                                        | 14                                        | 557                  | 757                    | 1.9                                                              |
| Postmeiosis and WT                        | 5                                         | 3                                         | 721                  | 1130                   | 0.43                                                             |

## LITERATURE CITED

- Gu, Z., R. Eils, and M. Schlesner. 2016. Complex heatmaps reveal patterns and correlations in multidimensional genomic data. *Bioinformatics* 32:2847–2849.
- Kampstra, P. 2008. Beanplot: A boxplot alternative for visual comparison of distributions. *J. Stat. Softw.* 28.
- Maekawa, M., C. Ito, Y. Toyama, F. Suzuki-Toyota, T. Kimura, T. Nakano, and K. Toshimori. 2004. Stage-specific expression of mouse germ cell-less-1 (mGCL-1), and multiple deformations during mgcl-1 deficient spermatogenesis leading to reduced fertility. *Arch. Histol. Cytol.* 67:335–347.
- McCarthy, D. J., Y. Chen, and G. K. Smyth. 2012. Differential expression analysis of multifactor RNA-Seq experiments with respect to biological variation. *Nucleic Acids Res.* 40:4288–4297.
- Nguyen, T. B., K. Manova, P. Capodiceci, C. Lindon, S. Bottega, X.-Y. Wang, J. Refik-Rogers, J. Pines, D. J. Wolgemuth, and A. Koff. 2002. Characterization and expression of mammalian cyclin b3, a prepachytene meiotic cyclin. *J. Biol. Chem.* 277:41960–41969.
- Oksanen, J., R. Kindt, P. Legendre, B. O'Hara, M. H. H. Stevens, M. J. Oksanen, and M. Suggests. 2007. The vegan package. *Community ecology package* 10:719.
